# Supplementary figures and images for: Hypoxia-activated chemotherapeutic TH-302 enhances the effects of VEGF-A inhibition and radiation on sarcomas
Source: PubMed Central journal article supplement — Br J Cancer. 2015 May 26;113(1):46–56. doi: 10.1038/bjc.2015.186 (PMC4647529; doi:10.1038/bjc.2015.186), 2015-05-26

**A** H&E of HT1080 Xenografts

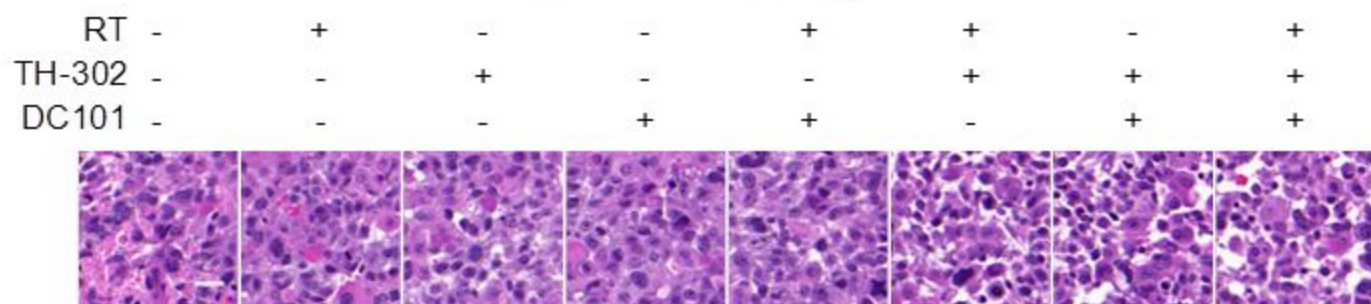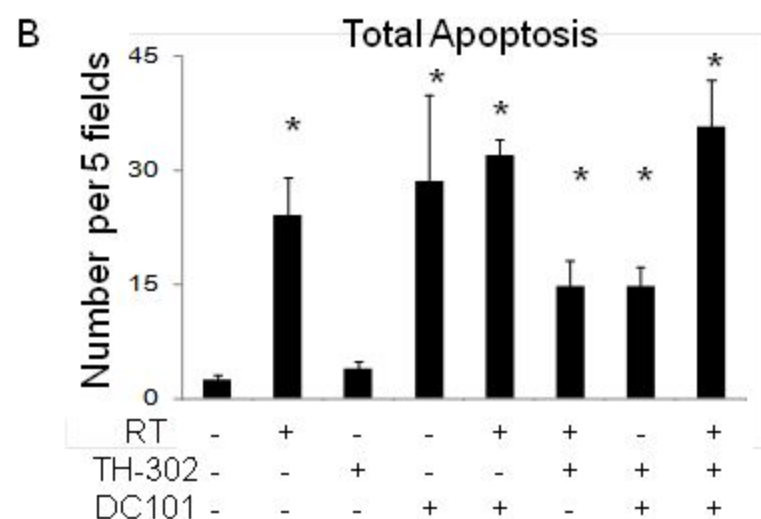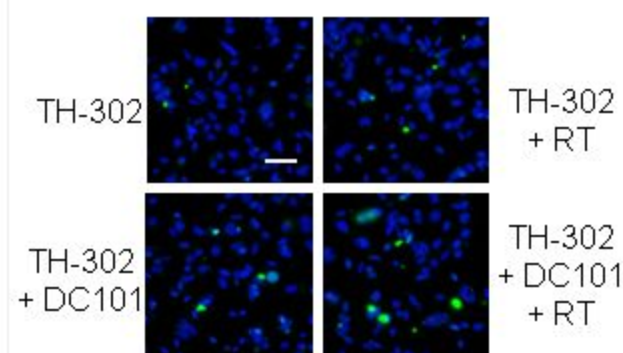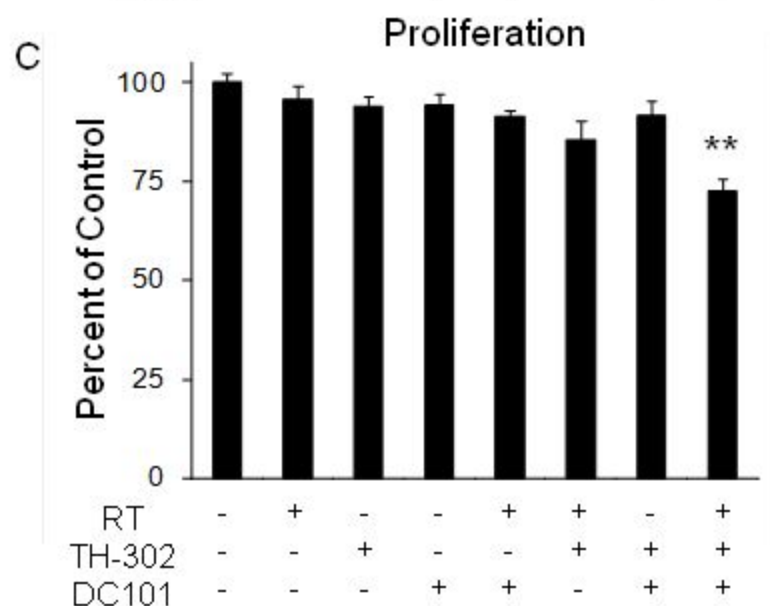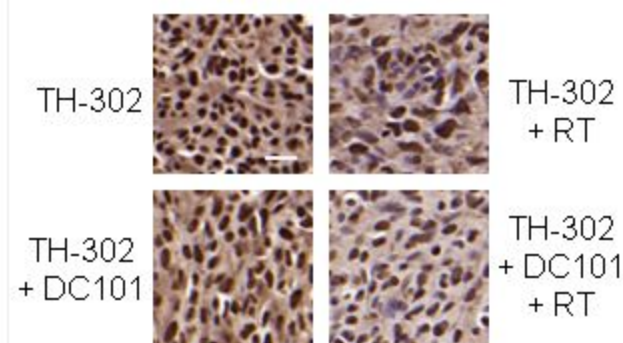

Supplement: bjc2015186x1.pdf [file bjc2015186x1.pdf]

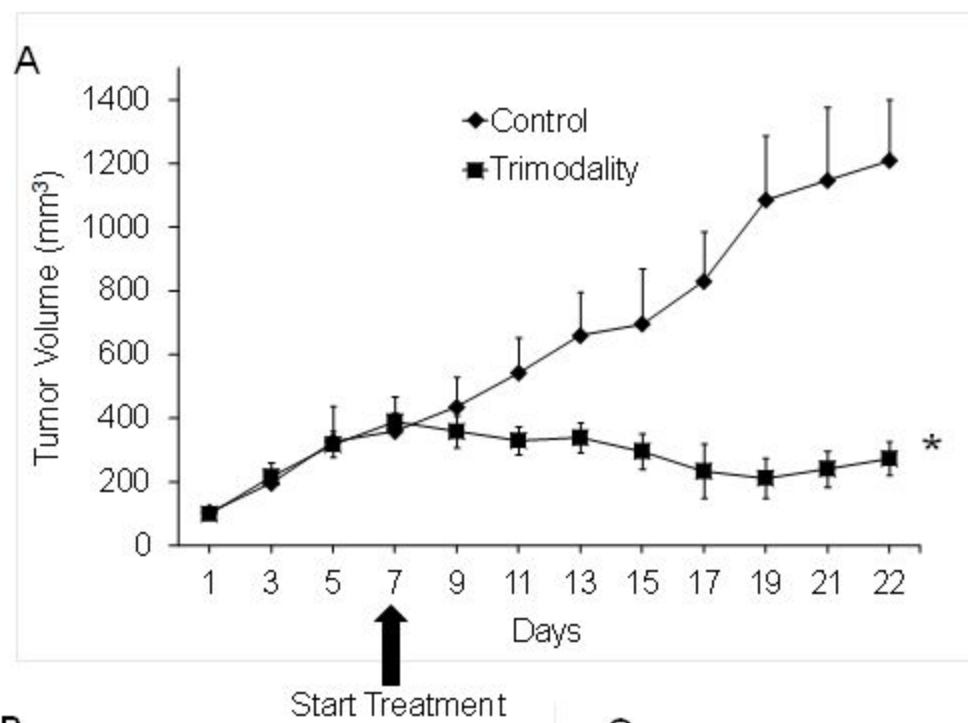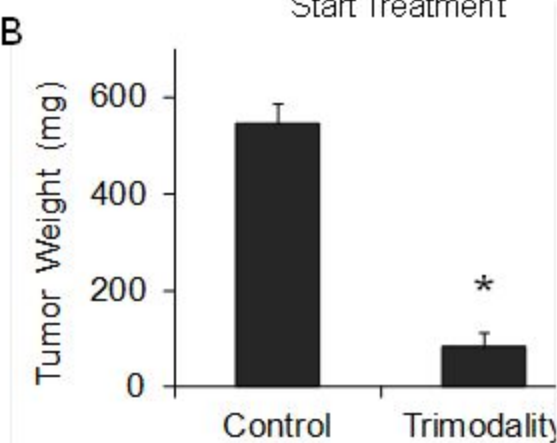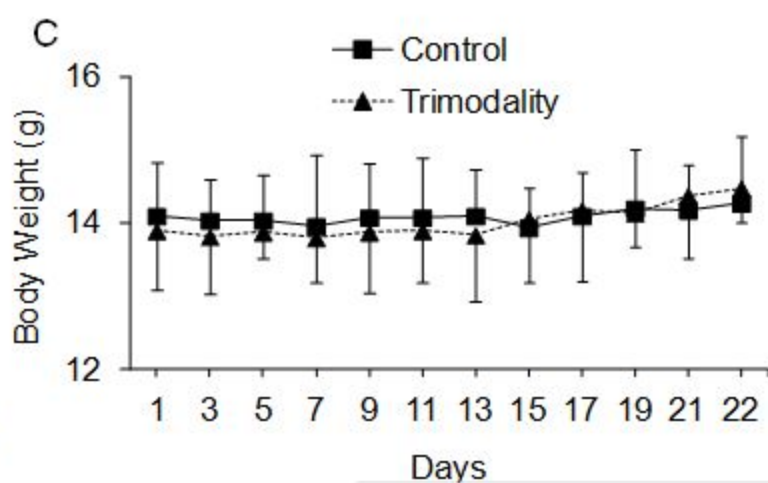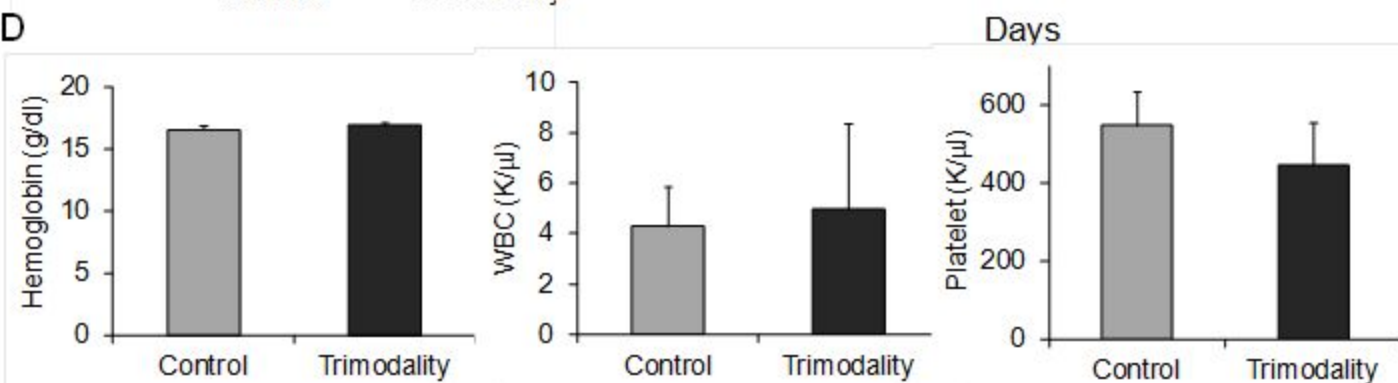

Supplement: bjc2015186x2.pdf [file bjc2015186x2.pdf]

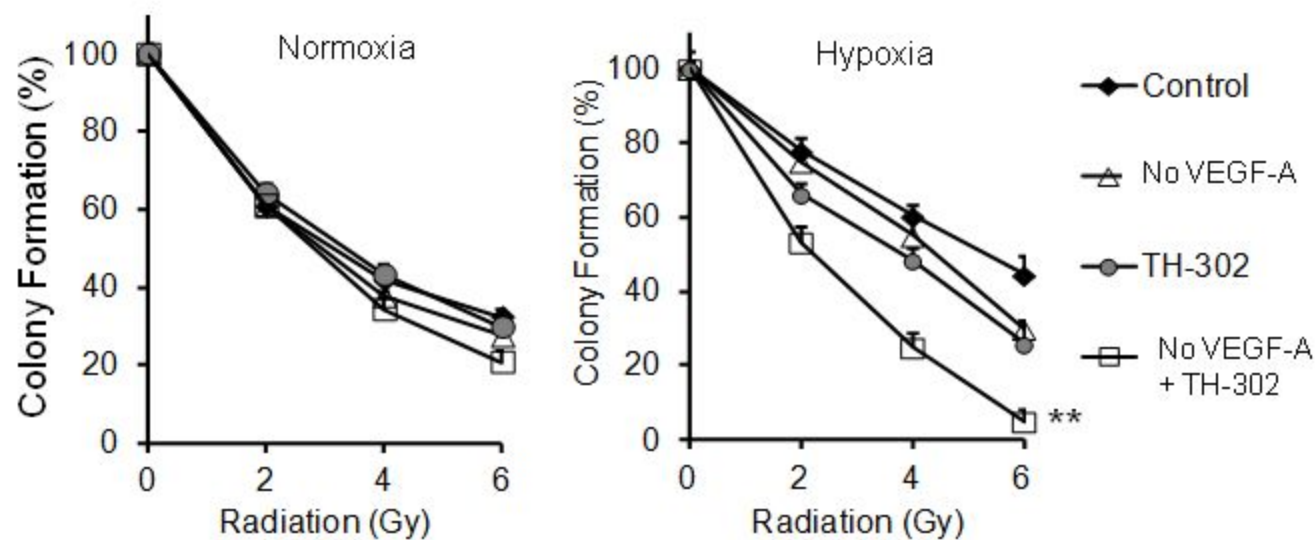

Supplement: bjc2015186x3.pdf [file bjc2015186x3.pdf]

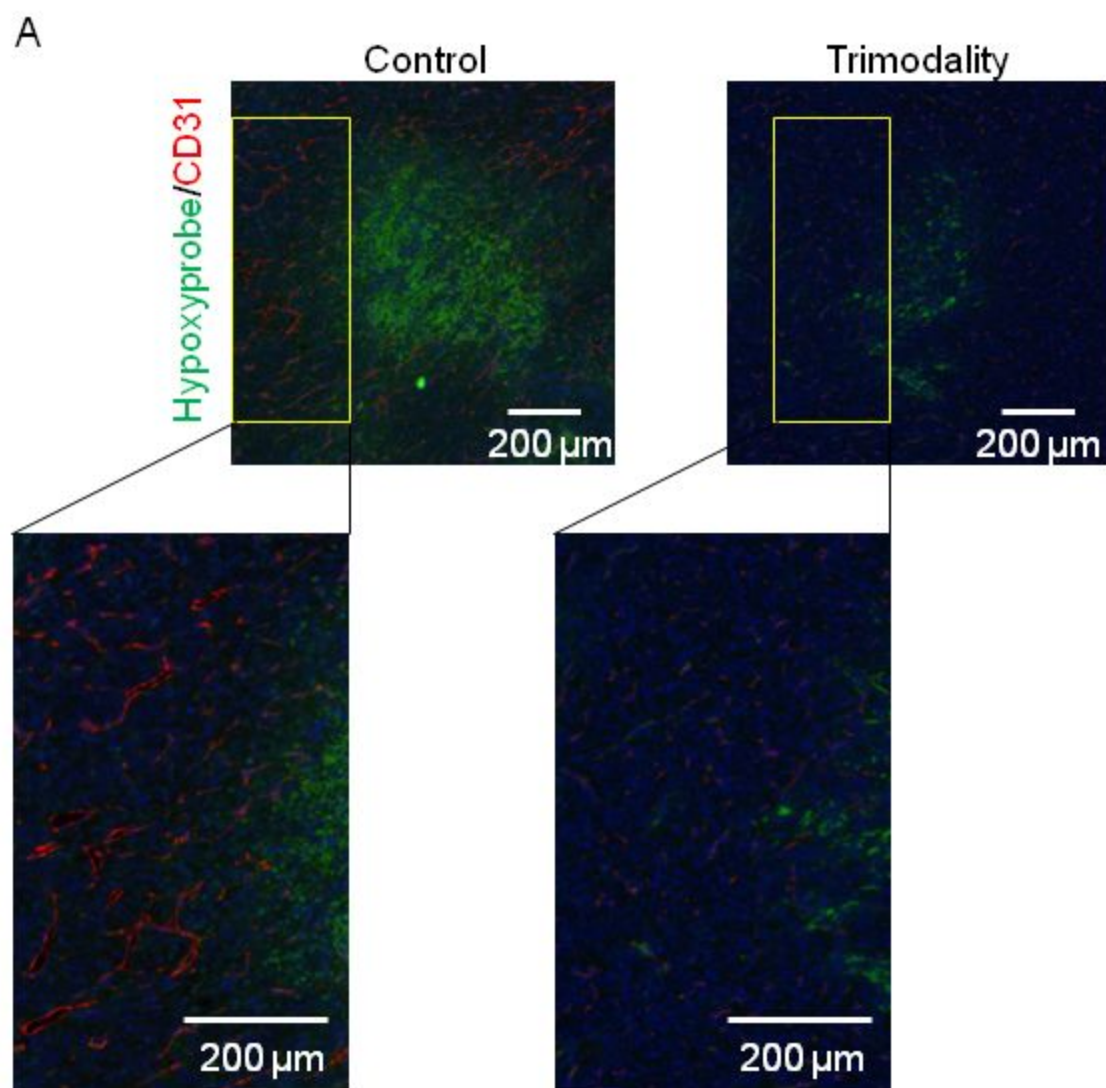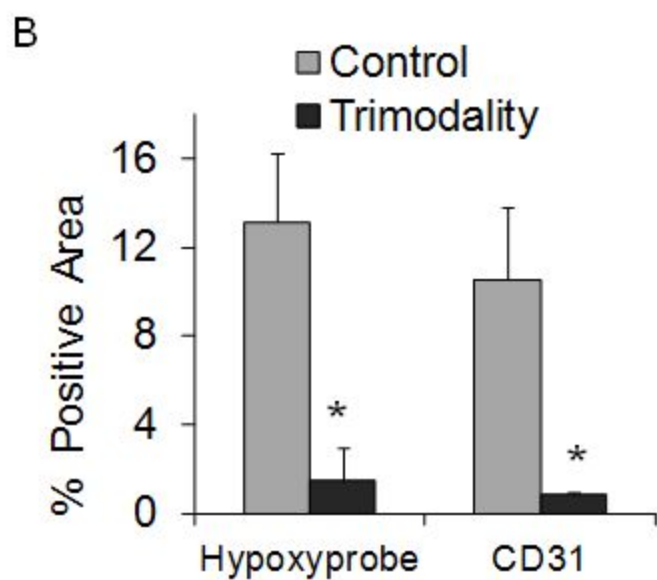

Supplement: bjc2015186x4.pdf [file bjc2015186x4.pdf]

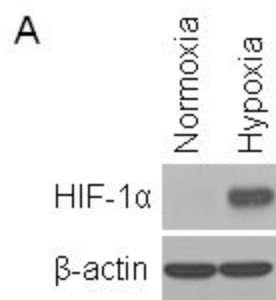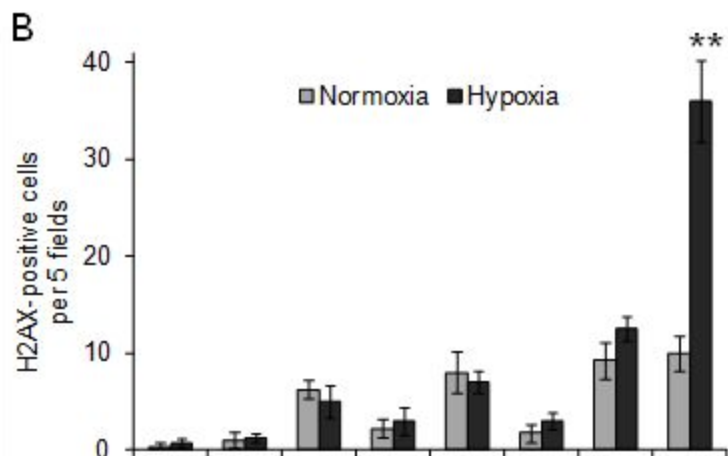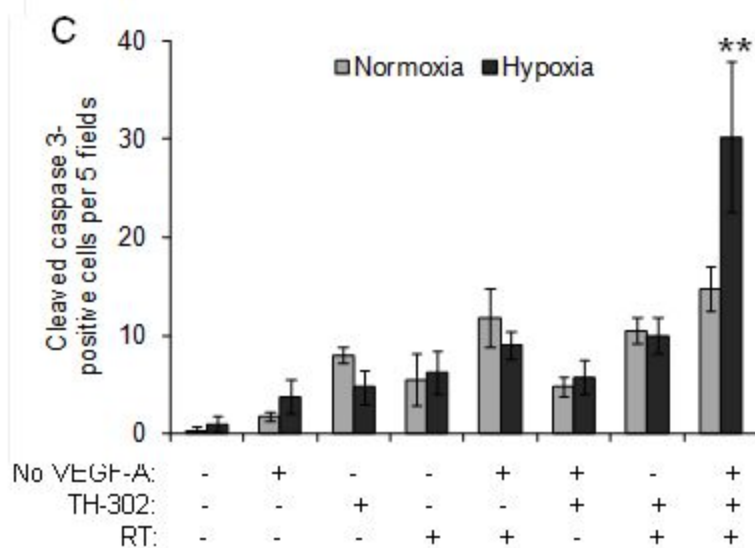

**D**

| No VEGF-A: | - | + | - | - | + | + | - | + |
|------------|---|---|---|---|---|---|---|---|
| TH-302:    | - | - | + | - | - | + | + | + |
| RT:        | - | - | - | + | + | - | + | + |

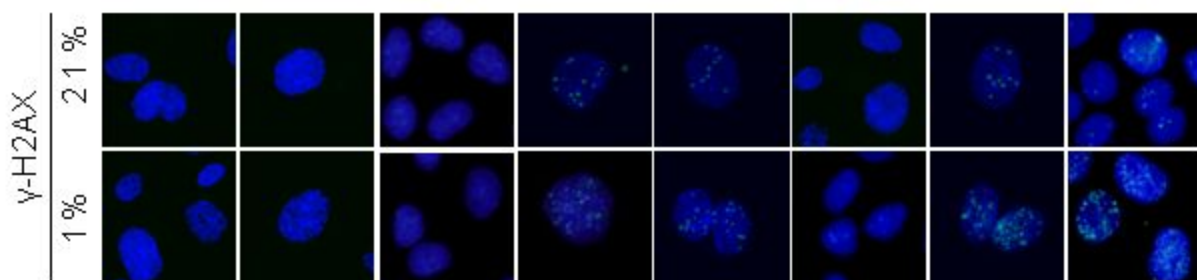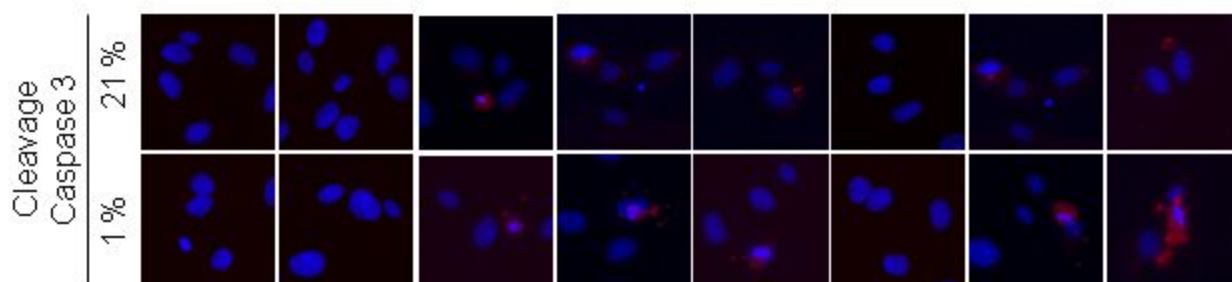

Supplement: bjc2015186x5.pdf [file bjc2015186x5.pdf]

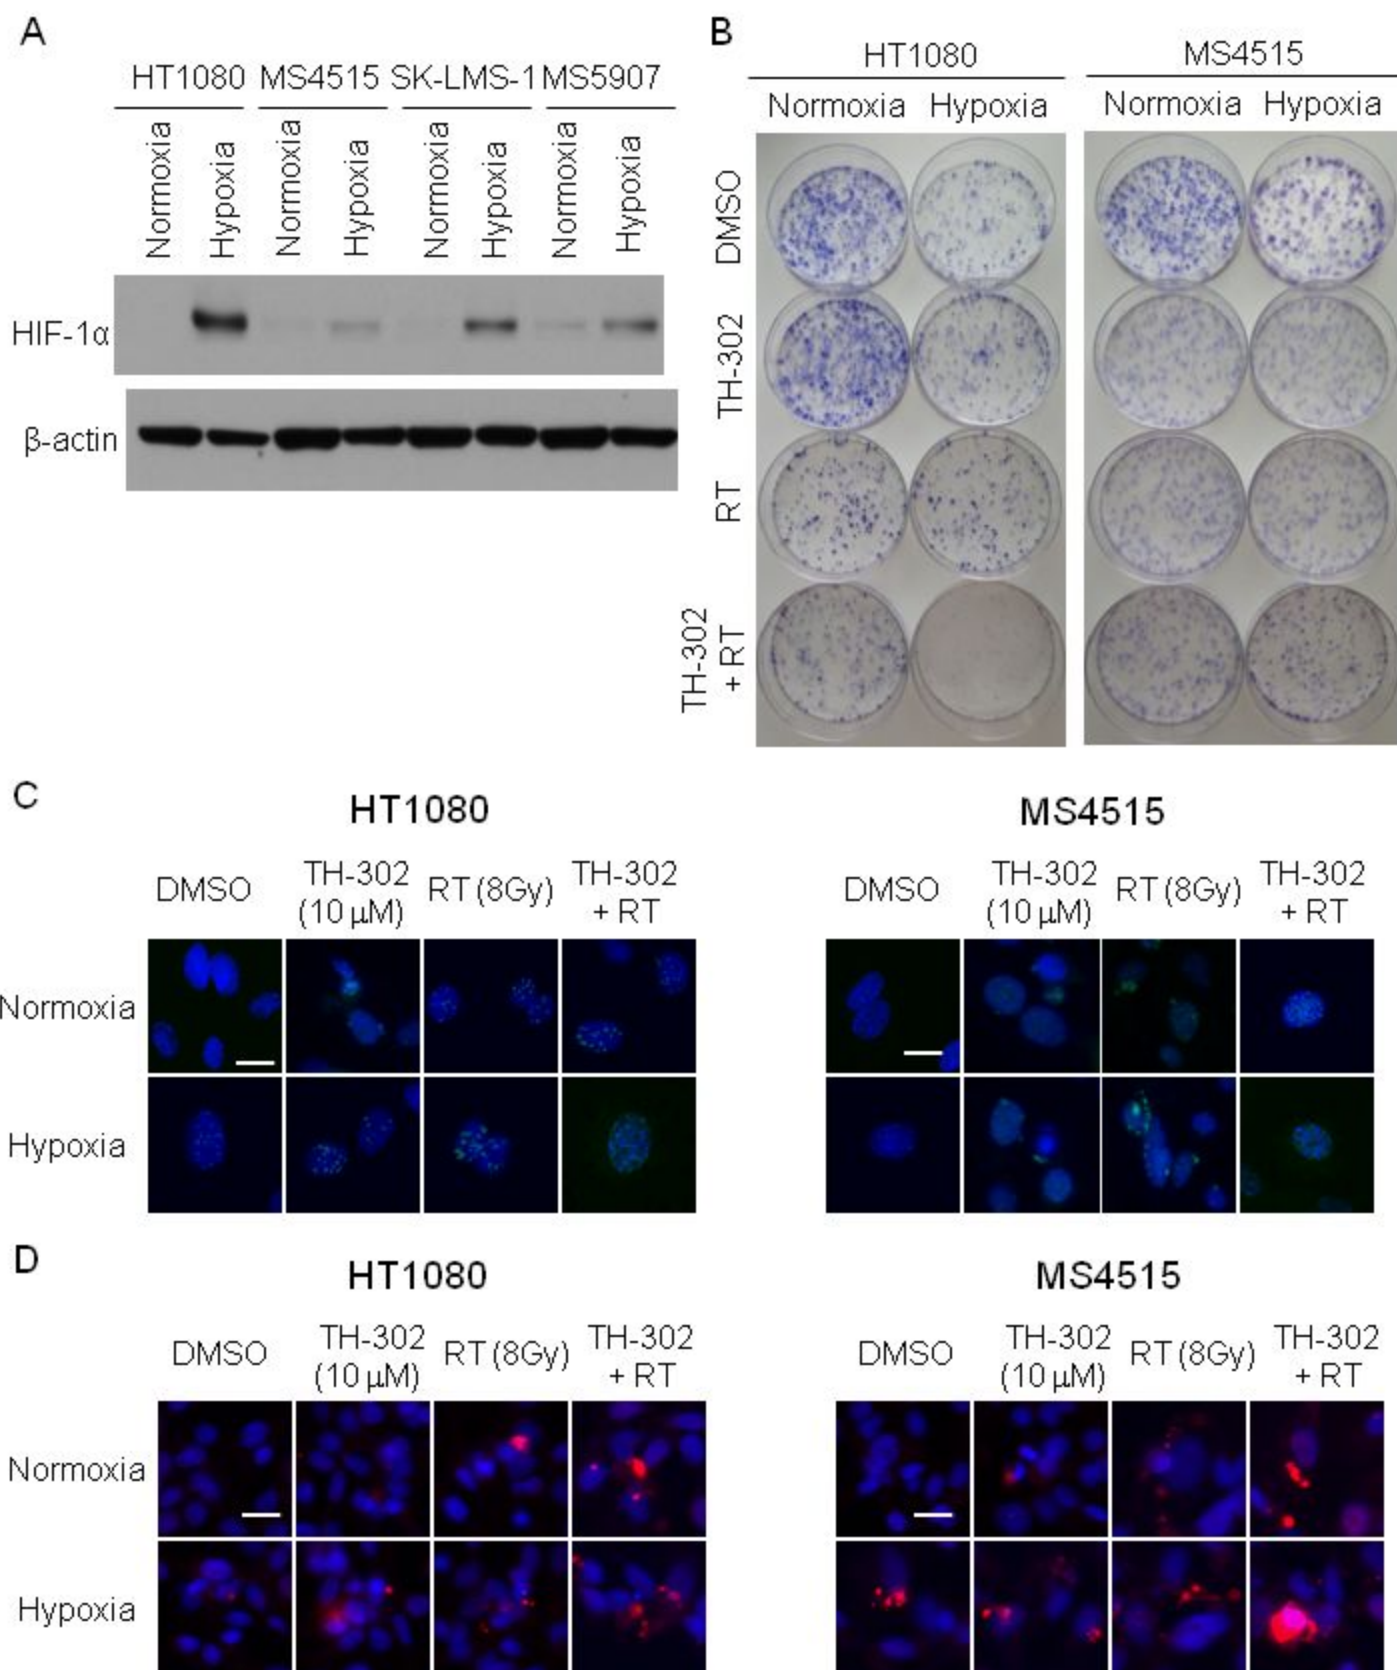

Supplement: bjc2015186x6.pdf [file bjc2015186x6.pdf]
